# Supplementary material for: Archive of bacterial community in anhydrite crystals from a deep-sea basin provides evidence of past oil-spilling in a benthic environment in the Red Sea
Source: Copernicus journal article supplement (doi:10.5194/bg-2016-204), 2016-07-18
Supplement: Supplementary file [file bg-2016-204-AC1-supplement.pdf]

Figure S1 Geographic map of the sampling site.

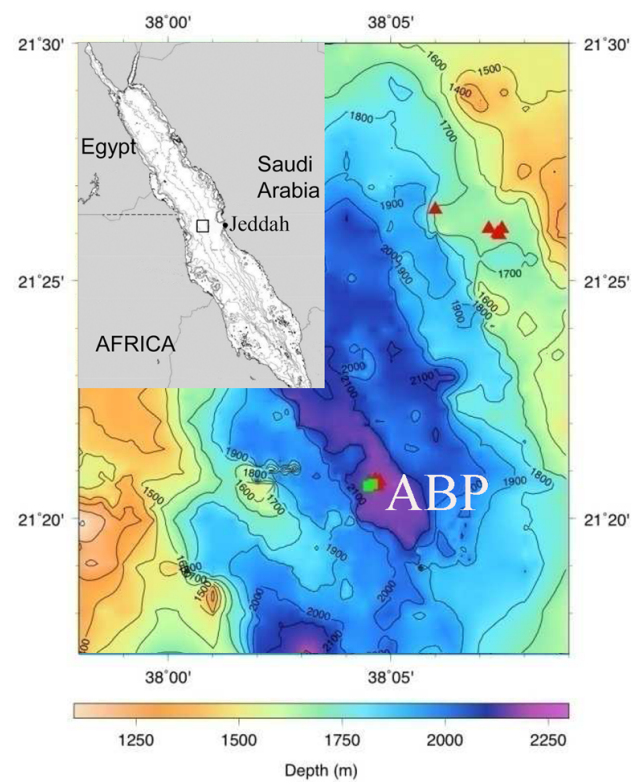

The gravity core was obtained from the bottom of the Atlantis II Deep (ABP) in 2008.

Figure S2. Genomic comparison between *Alcanivorax borkumensis* Sk2 and ABS183.

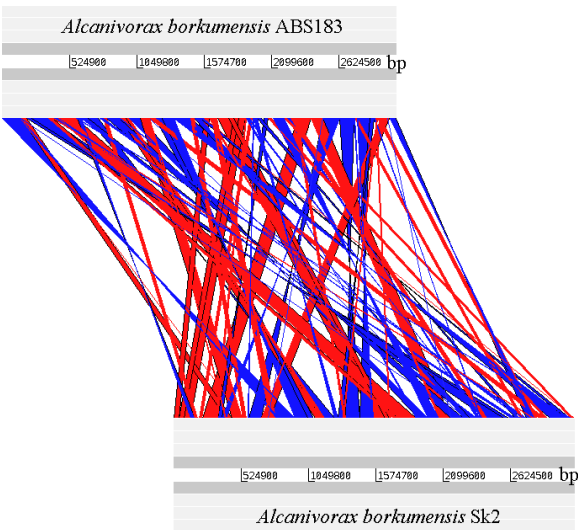

The comparison was conducted in ACT website (webact.org).
